# Supplementary material for: Proteome and Peptidome Changes and Zn Concentration in Chicken after In Ovo Stimulation with a Multi-Strain Probiotic and Zn-Gly Chelate: Preliminary Research
Source: MDPI journal article supplement (doi:10.3390/cimb46020080), 2024-02-01
Supplement: s1 [file s1]

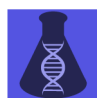**Table S1.** Results of two-way ANOVA for the effect of zinc-glycine chelate (group III, Zn-Gly+) and multi-strain probiotic (group II, Prob+) and interaction Zn-Gly+Prob+ (group IV) supplementation on zinc level in selected tissues at 12 hours and 7 days after hatching.

| Effect/Interaction         | Serum           |    |         |          |       |              |    |              |              |       |
|----------------------------|-----------------|----|---------|----------|-------|--------------|----|--------------|--------------|-------|
|                            | 12 h            |    |         |          |       | 7 days       |    |              |              |       |
|                            | SS              | df | MS      | F        | p     | SS           | df | MS           | F            | p     |
| Corrected model            | 8.68            | 1  | 8.68    | 894.59   | >0.01 | 0.56         | 1  | 0.56         | 92.59        | >0.01 |
| Zn-Gly+<br>(group III)     | 13.35           | 1  | 13.35   | 1375.24  | >0.01 | 0.00         | 1  | 0.00         | 0.25         | 0.62  |
| Prob+<br>(group II)        | 0.03            | 1  | 0.03    | 2.75     | 0.11  | 0.16         | 1  | 0.16         | 25.74        | >0.05 |
| Zn-Gly+Prob+<br>(group IV) | 8.64            | 1  | 8.64    | 889.93   | >0.01 | 0.01         | 1  | 0.01         | 1.23         | 0.28  |
| Error                      | 0.19            | 20 | 0.01    | 0.00     |       | 0.12         | 20 | 0.01         | 0.00         |       |
|                            | Liver           |    |         |          |       |              |    |              |              |       |
|                            | SS              | df | MS      | F        | p     | SS           | df | MS           | F            | p     |
|                            | SS              | df | MS      | F        | p     | SS           | df | MS           | F            | p     |
| Corrected model            | 3886.47         | 1  | 3886.47 | 1969.23  | >0.01 | 210.56       | 1  | 210.56       | 901423484.00 | >0.01 |
| Zn-Gly+<br>(group III)     | 3.51            | 1  | 3.51    | 1.78     | 0.19  | 0.00         | 1  | 0.00         | 131.00       | >0.01 |
| Prob+<br>(group II)        | 18.73           | 1  | 18.73   | 9.49     | >0.05 | 0.00         | 1  | 0.00         | 0.00         | 0.77  |
| Zn-Gly+Prob+<br>(group IV) | 2.04            | 1  | 2.04    | 1.03     | 0.32  | 0.00         | 1  | 0.00         | 3.00         | 0.12  |
| Error                      | 39.47           | 20 | 1.97    | 0.00     |       | 0.00         | 20 | 0.00         | 0.00         |       |
|                            | Small intestine |    |         |          |       |              |    |              |              |       |
|                            | SS              | df | MS      | F        | p     | SS           | df | MS           | F            | p     |
|                            | SS              | df | MS      | F        | p     | SS           | df | MS           | F            | p     |
| Corrected model            | 543.17          | 1  | 543.17  | 11675.75 | >0.01 | 2.487035E+41 | 1  | 2.487035E+41 | 126.48       | >0.01 |
| Zn-Gly+<br>(group III)     | 0.01            | 1  | 0.01    | 0.29     | 0.60  | 1.152930E+41 | 1  | 1.152930E+41 | 58.63        | >0.01 |
| Prob+<br>(group II)        | 0.00            | 1  | 0.00    | 0.10     | 0.76  | 1.651029E+40 | 1  | 1.651029E+40 | 8.40         | >0.05 |
| Zn-Gly+Prob+<br>(group IV) | 0.01            | 1  | 0.01    | 0.28     | 0.60  | 1.597927E+40 | 1  | 1.597927E+40 | 8.13         | >0.05 |
| Error                      | 0.93            | 20 | 0.05    | 0.00     |       | 3.932776E+40 | 20 | 1.966388E+39 |              |       |
|                            | Yolk sac        |    |         |          |       |              |    |              |              |       |
|                            | SS              | df | MS      | F        | p     | SS           | df | MS           | F            | p     |
|                            | SS              | df | MS      | F        | p     | SS           | df | MS           | F            | p     |
| Corrected model            | 426.10          | 1  | 426.10  | 9803.90  | >0.01 |              |    |              |              |       |
| Zn-Gly+<br>(group III)     | 4.10            | 1  | 4.10    | 94.43    | >0.01 |              |    |              |              |       |
| Prob+<br>(group II)        | 0.02            | 1  | 0.02    | 0.50     | 0.5   |              |    |              |              |       |
| Zn-Gly+Prob+<br>(group IV) | 1.81            | 1  | 1.81    | 41.56    | >0.01 |              |    |              |              |       |

---

|            |      |    |      |  |
|------------|------|----|------|--|
| (group IV) |      |    |      |  |
| Error      | 0.87 | 20 | 0.04 |  |

---

SS – sum of squares; df – degrees of freedom; MS – mean square; F – ratio of variance, *p* – significance level.
